# Supplementary material for: Metal salt assisted electrospray ionization mass spectrometry for the soft ionization of GAP polymers in negative ion mode
Source: Royal Society of Chemistry journal article supplement (doi:10.1039/c9an01887e), 2019-10-30
Supplement: c9an01887e1.pdf [file c9an01887e1.pdf]

## Electronic Supplementary Information

### Metal Salt Assisted Electrospray Ionization Mass Spectrometry for Soft Ionization of GAP Polymers in Negative Ion Mode

Theoneste Muyizere,<sup>a,‡</sup> Yajun Zheng,<sup>a,‡</sup> Hongni Liu,<sup>b,‡</sup> Jia Zhao,<sup>a</sup> Jin Li,<sup>a</sup> Xianming Lu,<sup>b</sup> Daniel E. Austin,<sup>c</sup> and Zhiping Zhang<sup>a,\*</sup>

<sup>a</sup> School of Chemistry and Chemical Engineering, Xi'an Shiyou University, Xi'an 710065, China

<sup>b</sup> Xi'an Modern Chemistry Research Institute, Xi'an 710065, China

<sup>c</sup> Department of Chemistry and Biochemistry, Brigham Young University, Provo, Utah 84602, United States

\*To whom correspondence should be addressed. E-mail: zhangzp0304@gmail.com (Z.Z.)

‡ These authors contributed equally to this work.

**Table S1.** Comparison of the observed peaks in the systems with NaNO<sub>3</sub> and related parameters in negative ion mode with variation in applied voltage

| condition | NaNO <sub>3</sub> or not | series | composition                                     | observed peaks |      |      |      |      |       |       |       |       |       | M <sub>n</sub> | M <sub>w</sub> | PDI   |       |       |        |       |
|-----------|--------------------------|--------|-------------------------------------------------|----------------|------|------|------|------|-------|-------|-------|-------|-------|----------------|----------------|-------|-------|-------|--------|-------|
|           |                          |        | basic unit                                      | M <sub>1</sub> | 486, | 585, | 684, | 783, | 882,  | 981,  | 1080, | 1179, | 1278, | 1377,          | 1476,          | 1575, | 1674  |       |        |       |
| -2.5 kV   | N-with                   | A      | [M <sub>1</sub> +NO <sub>3</sub> ] <sup>-</sup> | m/z            | 647, | 746, | 845, | 944, | 1043, | 1142, | 1241, | 1340, | 1439, | 1538,          | 1637           |       | 949.1 | 989.2 | 1.042  |       |
| -3.0 kV   | N-with                   | A      | [M <sub>1</sub> +NO <sub>3</sub> ] <sup>-</sup> | m/z            | 548, | 647, | 746, | 845, | 944,  | 1043, | 1142, | 1241, | 1340, | 1439,          | 1538,          | 1637, | 1736  | 942.7 | 997.7  | 1.058 |
| -3.5 kV   | N-with                   | A      | [M <sub>1</sub> +NO <sub>3</sub> ] <sup>-</sup> | m/z            | 548, | 647, | 746, | 845, | 944,  | 1043, | 1142, | 1241, | 1340, | 1439,          | 1538,          | 1637, | 1736  | 979.5 | 1031.8 | 1.053 |
| -4.0 kV   | N-with                   | A      | [M <sub>1</sub> +NO <sub>3</sub> ] <sup>-</sup> | m/z            | 548, | 647, | 746, | 845, | 944,  | 1043, | 1142, | 1241, | 1340, | 1439,          | 1538,          | 1637, | 1736  | 990.6 | 1040.6 | 1.050 |
|           |                          |        | basic unit                                      | M <sub>2</sub> | 414, | 513, | 612, | 711, | 810,  | 909,  | 1008, | 1107, | 1206, | 1305,          | 1404           |       |       |       |        |       |
| -2.5 kV   | N-with                   | B      | [M <sub>2</sub> +NO <sub>3</sub> ] <sup>-</sup> | m/z            | 575, | 674, | 773, | 872, | 971,  | 1070, | 1169, | 1268, | 1367  |                |                |       | 810.2 | 833.2 | 1.028  |       |
| -3.0 kV   | N-with                   | B      | [M <sub>2</sub> +NO <sub>3</sub> ] <sup>-</sup> | m/z            | 476, | 575, | 674, | 773, | 872,  | 971,  | 1070, | 1169, | 1268, | 1367,          | 1466           |       | 802.6 | 851.7 | 1.061  |       |
| -3.5 kV   | N-with                   | B      | [M <sub>2</sub> +NO <sub>3</sub> ] <sup>-</sup> | m/z            | 476, | 575, | 674, | 773, | 872,  | 971,  | 1070, | 1169, | 1268, | 1367,          | 1466,          | 1565  | 812.0 | 860.4 | 1.060  |       |
| -4.0 kV   | N-with                   | B      | [M <sub>2</sub> +NO <sub>3</sub> ] <sup>-</sup> | m/z            | 476, | 575, | 674, | 773, | 872,  | 971,  | 1070, | 1169, | 1268, | 1367,          | 1466,          | 1565  | 797.9 | 841.0 | 1.054  |       |

Note: "N-with" means "negative ion mode and with NaNO<sub>3</sub>". A and B mean series A and B in Figure 3 in the main text. Due the relative low peak intensity for other series, the M<sub>n</sub>, M<sub>w</sub> and PDI values were not calculated.

**Table S2.** Comparison of the observed peaks in the systems with NaNO<sub>3</sub> and related parameters in negative ion mode with variation in concentration of NaNO<sub>3</sub>

| condition                | NaNO <sub>3</sub> or not | series | composition                                     | observed peaks |      |      |      |      |      |       |       |       |       | M <sub>n</sub> | M <sub>w</sub> | PDI   |       |        |        |       |
|--------------------------|--------------------------|--------|-------------------------------------------------|----------------|------|------|------|------|------|-------|-------|-------|-------|----------------|----------------|-------|-------|--------|--------|-------|
|                          |                          |        | basic unit                                      | M <sub>1</sub> | 486, | 585, | 684, | 783, | 882, | 981,  | 1080, | 1179, | 1278, | 1377,          | 1476,          | 1575, | 1674  |        |        |       |
| 0 mmol L <sup>-1</sup>   | N-with                   | A      | [M <sub>1</sub> +NO <sub>3</sub> ] <sup>-</sup> | m/z            | 548, | 647, | 746, | 845, | 944, | 1043, | 1142, | 1241  |       |                |                |       | 693.1 | 713.1  | 1.029  |       |
| 0.1 mmol L <sup>-1</sup> | N-with                   | A      | [M <sub>1</sub> +NO <sub>3</sub> ] <sup>-</sup> | m/z            | 548, | 647, | 746, | 845, | 944, | 1043, | 1142, | 1241, | 1340, | 1439,          | 1538,          | 1637  | 804.8 | 854.0  | 1.061  |       |
| 0.5 mmol L <sup>-1</sup> | N-with                   | A      | [M <sub>1</sub> +NO <sub>3</sub> ] <sup>-</sup> | m/z            | 548, | 647, | 746, | 845, | 944, | 1043, | 1142, | 1241, | 1340, | 1439,          | 1538,          | 1637, | 1736  | 1010.0 | 1053.6 | 1.043 |
| 1.0 mmol L <sup>-1</sup> | N-with                   | A      | [M <sub>1</sub> +NO <sub>3</sub> ] <sup>-</sup> | m/z            | 548, | 647, | 746, | 845, | 944, | 1043, | 1142, | 1241, | 1340, | 1439,          | 1538,          | 1637, | 1736  | 1042.6 | 1093.1 | 1.048 |
| 1.5 mmol L <sup>-1</sup> | N-with                   | A      | [M <sub>1</sub> +NO <sub>3</sub> ] <sup>-</sup> | m/z            | 548, | 647, | 746, | 845, | 944, | 1043, | 1142, | 1241, | 1340, | 1439,          | 1538,          | 1637, |       | 1027.2 | 1070.5 | 1.042 |
| 2.0 mmol L <sup>-1</sup> | N-with                   | A      | [M <sub>1</sub> +NO <sub>3</sub> ] <sup>-</sup> | m/z            | 548, | 647, | 746, | 845, | 944, | 1043, | 1142, | 1241, | 1340, | 1439,          | 1538,          | 1637, |       | 994.8  | 1040.9 | 1.046 |
| 3.0 mmol L <sup>-1</sup> | N-with                   | A      | [M <sub>1</sub> +NO <sub>3</sub> ] <sup>-</sup> | m/z            | 548, | 647, | 746, | 845, | 944, | 1043, | 1142, | 1241, | 1340, | 1439,          | 1538,          | 1637, |       | 1038.8 | 1093.2 | 1.052 |
| 5.0 mmol L <sup>-1</sup> | N-with                   | A      | [M <sub>1</sub> +NO <sub>3</sub> ] <sup>-</sup> | m/z            | 548, | 647, | 746, | 845, | 944, | 1043, | 1142, | 1241  |       |                |                |       | 857.9 | 889.9  | 1.037  |       |
|                          |                          |        | basic unit                                      | M <sub>2</sub> | 414, | 513, | 612, | 711, | 810, | 909,  | 1008, | 1107, | 1206, | 1305,          | 1404           |       |       |        |        |       |
| 0 mmol L <sup>-1</sup>   | N-with                   | B      | [M <sub>2</sub> +NO <sub>3</sub> ] <sup>-</sup> | m/z            | 575, | 674, | 773, | 872  |      |       |       |       |       |                |                |       | 673.9 | 687.3  | 1.020  |       |
| 0.1 mmol L <sup>-1</sup> | N-with                   | B      | [M <sub>2</sub> +NO <sub>3</sub> ] <sup>-</sup> | m/z            | 575, | 674, | 773, | 872, | 971, | 1070, | 1169, | 1268  |       |                |                |       | 732.4 | 756.0  | 1.032  |       |
| 0.5 mmol L <sup>-1</sup> | N-with                   | B      | [M <sub>2</sub> +NO <sub>3</sub> ] <sup>-</sup> | m/z            | 575, | 674, | 773, | 872, | 971, | 1070, | 1169, | 1268, | 1367, | 1466           |                |       | 836.9 | 874.4  | 1.045  |       |
| 1.0 mmol L <sup>-1</sup> | N-with                   | B      | [M <sub>2</sub> +NO <sub>3</sub> ] <sup>-</sup> | m/z            | 575, | 674, | 773, | 872, | 971, | 1070, | 1169, | 1268, | 1367, | 1466           |                |       | 823.3 | 870.8  | 1.057  |       |
| 1.5 mmol L <sup>-1</sup> | N-with                   | B      | [M <sub>2</sub> +NO <sub>3</sub> ] <sup>-</sup> | m/z            | 575, | 674, | 773, | 872, | 971, | 1070, | 1169, | 1268, | 1367, | 1466           |                |       | 803.4 | 848.0  | 1.056  |       |
| 2.0 mmol L <sup>-1</sup> | N-with                   | B      | [M <sub>2</sub> +NO <sub>3</sub> ] <sup>-</sup> | m/z            | 575, | 674, | 773, | 872, | 971, | 1070, | 1169, | 1268, | 1367, | 1466           |                |       | 789.1 | 834.3  | 1.057  |       |
| 3.0 mmol L <sup>-1</sup> | N-with                   | B      | [M <sub>2</sub> +NO <sub>3</sub> ] <sup>-</sup> | m/z            | 575, | 674, | 773, | 872, | 971, | 1070, | 1169, | 1268, | 1367, | 1466           |                |       | 798.4 | 859.9  | 1.077  |       |
| 5.0 mmol L <sup>-1</sup> | N-with                   | B      | [M <sub>2</sub> +NO <sub>3</sub> ] <sup>-</sup> | m/z            | 575, | 674, | 773, | 872, | 971, | 1070  |       |       |       |                |                |       | 718.9 | 741.9  | 1.032  |       |

Note: "N-with" means "negative ion mode and with NaNO<sub>3</sub>". A and B mean series A and B in Figure 4 in the main text. Due the relative low peak intensity for other series, the M<sub>n</sub>, M<sub>w</sub> and PDI values were not calculated.

**Table S3.** Comparison of the observed peaks in the systems with NaNO<sub>3</sub> and related parameters in negative ion mode with variation in the types of metal salts

| metal salt                        | NaNO <sub>3</sub> or not | series     | composition                                     | observed peaks                                                         |     |     |     |     |     |      |      |      |      |      | $M_n$ | $M_w$ | $PDI$ |        |        |       |
|-----------------------------------|--------------------------|------------|-------------------------------------------------|------------------------------------------------------------------------|-----|-----|-----|-----|-----|------|------|------|------|------|-------|-------|-------|--------|--------|-------|
|                                   |                          | basic unit | M <sub>1</sub>                                  | 486, 585, 684, 783, 882, 981, 1080, 1179, 1278, 1377, 1476, 1575, 1674 |     |     |     |     |     |      |      |      |      |      |       |       |       |        |        |       |
| AgNO <sub>3</sub>                 | N-with                   | A          | [M <sub>1</sub> +NO <sub>3</sub> ] <sup>-</sup> | m/z                                                                    | 548 | 647 | 746 | 845 | 944 | 1043 | 1142 | 1241 | 1340 | 1439 | 1538  | 1637  | 1736  | 1014.1 | 1054.3 | 1.040 |
| Mg(NO <sub>3</sub> ) <sub>2</sub> | N-with                   | A          | [M <sub>1</sub> +NO <sub>3</sub> ] <sup>-</sup> | m/z                                                                    | 548 | 647 | 746 | 845 | 944 | 1043 | 1142 | 1241 | 1340 | 1439 | 1538  | 1637  | 1736  | 946.8  | 997.4  | 1.053 |
| Co(NO <sub>3</sub> ) <sub>2</sub> | N-with                   | A          | [M <sub>1</sub> +NO <sub>3</sub> ] <sup>-</sup> | m/z                                                                    | 548 | 647 | 746 | 845 | 944 | 1043 | 1142 | 1241 | 1340 | 1439 | 1538  | 1637  |       | 1010.5 | 1054.3 | 1.043 |
| Ni(NO <sub>3</sub> ) <sub>2</sub> | N-with                   | A          | [M <sub>1</sub> +NO <sub>3</sub> ] <sup>-</sup> | m/z                                                                    | 548 | 647 | 746 | 845 | 944 | 1043 | 1142 | 1241 | 1340 | 1439 | 1538  | 1637  |       | 894.8  | 949.1  | 1.061 |
| Cu(NO <sub>3</sub> ) <sub>2</sub> | N-with                   | A          | [M <sub>1</sub> +NO <sub>3</sub> ] <sup>-</sup> | m/z                                                                    | 548 | 647 | 746 | 845 | 944 | 1043 | 1142 | 1241 | 1340 | 1439 | 1538  | 1637  | 1736  | 1020.2 | 1070.8 | 1.050 |
| Zn(NO <sub>3</sub> ) <sub>2</sub> | N-with                   | A          | [M <sub>1</sub> +NO <sub>3</sub> ] <sup>-</sup> | m/z                                                                    | 548 | 647 | 746 | 845 | 944 | 1043 | 1142 | 1241 | 1340 | 1439 | 1538  | 1637  | 1736  | 980.2  | 1032.4 | 1.053 |
| Ba(NO <sub>3</sub> ) <sub>2</sub> | N-with                   | A          | [M <sub>1</sub> +NO <sub>3</sub> ] <sup>-</sup> | m/z                                                                    | 548 | 647 | 746 | 845 | 944 | 1043 | 1142 | 1241 | 1340 | 1439 | 1538  | 1637  |       | 923.0  | 968.3  | 1.049 |
| Pb(NO <sub>3</sub> ) <sub>2</sub> | N-with                   | A          | [M <sub>1</sub> +NO <sub>3</sub> ] <sup>-</sup> | m/z                                                                    | 548 | 647 | 746 | 845 | 944 | 1043 | 1142 | 1241 | 1340 | 1439 | 1538  | 1637  |       | 952.9  | 997.2  | 1.046 |
| Cr(NO <sub>3</sub> ) <sub>3</sub> | N-with                   | A          | [M <sub>1</sub> +NO <sub>3</sub> ] <sup>-</sup> | m/z                                                                    | 548 | 647 | 746 | 845 | 944 | 1043 | 1142 | 1241 | 1340 | 1439 | 1538  | 1637  | 1736  | 1000.2 | 1048.0 | 1.048 |
| Al(NO <sub>3</sub> ) <sub>3</sub> | N-with                   | A          | [M <sub>1</sub> +NO <sub>3</sub> ] <sup>-</sup> | m/z                                                                    | 548 | 647 | 746 | 845 | 944 | 1043 | 1142 | 1241 | 1340 | 1439 | 1538  |       |       | 905.5  | 952.8  | 1.052 |
| Fe(NO <sub>3</sub> ) <sub>3</sub> | N-with                   | A          | [M <sub>1</sub> +NO <sub>3</sub> ] <sup>-</sup> | m/z                                                                    | 548 | 647 | 746 | 845 | 944 | 1043 | 1142 | 1241 | 1340 | 1439 | 1538  | 1637  |       | 905.7  | 949.3  | 1.048 |
|                                   |                          | basic unit | M <sub>2</sub>                                  | 414, 513, 612, 711, 810, 909, 1008, 1107, 1206, 1305, 1404             |     |     |     |     |     |      |      |      |      |      |       |       |       |        |        |       |
| AgNO <sub>3</sub>                 | N-with                   | B          | [M <sub>2</sub> +NO <sub>3</sub> ] <sup>-</sup> | m/z                                                                    | 575 | 674 | 773 | 872 | 971 | 1070 | 1169 | 1268 | 1367 | 1466 | 1565  |       |       | 841.7  | 875.3  | 1.040 |
| Mg(NO <sub>3</sub> ) <sub>2</sub> | N-with                   | B          | [M <sub>2</sub> +NO <sub>3</sub> ] <sup>-</sup> | m/z                                                                    | 575 | 674 | 773 | 872 | 971 | 1070 | 1169 | 1268 | 1367 | 1466 |       |       |       | 830.8  | 867.1  | 1.044 |
| Co(NO <sub>3</sub> ) <sub>2</sub> | N-with                   | B          | [M <sub>2</sub> +NO <sub>3</sub> ] <sup>-</sup> | m/z                                                                    | 575 | 674 | 773 | 872 | 971 | 1070 | 1169 | 1268 | 1367 | 1466 |       |       |       | 824.6  | 868.5  | 1.053 |
| Ni(NO <sub>3</sub> ) <sub>2</sub> | N-with                   | B          | [M <sub>2</sub> +NO <sub>3</sub> ] <sup>-</sup> | m/z                                                                    | 476 | 575 | 674 | 773 | 872 | 971  | 1070 | 1169 | 1268 | 1367 |       |       |       | 763.9  | 801.9  | 1.050 |
| Cu(NO <sub>3</sub> ) <sub>2</sub> | N-with                   | B          | [M <sub>2</sub> +NO <sub>3</sub> ] <sup>-</sup> | m/z                                                                    | 575 | 674 | 773 | 872 | 971 | 1070 | 1169 | 1268 | 1367 | 1466 |       |       |       | 847.1  | 891.6  | 1.053 |
| Zn(NO <sub>3</sub> ) <sub>2</sub> | N-with                   | B          | [M <sub>2</sub> +NO <sub>3</sub> ] <sup>-</sup> | m/z                                                                    | 476 | 575 | 674 | 773 | 872 | 971  | 1070 | 1169 | 1268 | 1367 | 1466  |       |       | 808.2  | 854.1  | 1.057 |
| Ba(NO <sub>3</sub> ) <sub>2</sub> | N-with                   | B          | [M <sub>2</sub> +NO <sub>3</sub> ] <sup>-</sup> | m/z                                                                    | 575 | 674 | 773 | 872 | 971 | 1070 | 1169 | 1268 | 1367 |      |       |       |       | 825.4  | 858.6  | 1.040 |
| Pb(NO <sub>3</sub> ) <sub>2</sub> | N-with                   | B          | [M <sub>2</sub> +NO <sub>3</sub> ] <sup>-</sup> | m/z                                                                    | 476 | 575 | 674 | 773 | 872 | 971  | 1070 | 1169 | 1268 | 1367 | 1466  | 1565  |       | 795.1  | 833.8  | 1.049 |
| Cr(NO <sub>3</sub> ) <sub>3</sub> | N-with                   | B          | [M <sub>2</sub> +NO <sub>3</sub> ] <sup>-</sup> | m/z                                                                    | 575 | 674 | 773 | 872 | 971 | 1070 | 1169 | 1268 | 1367 | 1466 | 1565  |       |       | 854.4  | 893.1  | 1.045 |
| Al(NO <sub>3</sub> ) <sub>3</sub> | N-with                   | B          | [M <sub>2</sub> +NO <sub>3</sub> ] <sup>-</sup> | m/z                                                                    | 476 | 575 | 674 | 773 | 872 | 971  | 1070 | 1169 | 1268 | 1367 | 1466  |       |       | 753.9  | 787.5  | 1.044 |
| Fe(NO <sub>3</sub> ) <sub>3</sub> | N-with                   | B          | [M <sub>2</sub> +NO <sub>3</sub> ] <sup>-</sup> | m/z                                                                    | 575 | 674 | 773 | 872 | 971 | 1070 | 1169 | 1268 | 1367 |      |       |       |       | 779.6  | 807.1  | 1.035 |

Note: "N-with" means "negative ion mode and with NaNO<sub>3</sub>". A and B mean series A and B in Figure S1 as below. Due the relative low peak intensity for other series, the  $M_n$ ,  $M_w$  and  $PDI$  values were not calculated.

**Table S4.** Comparison of the observed peaks in the systems with different salts and related parameters in negative ion modes

| salt                            | with or not | series | composition         | observed peaks                                       |                                                                         |  |  |  |  |        | $M_n$  | $M_w$ | $PDI$ |
|---------------------------------|-------------|--------|---------------------|------------------------------------------------------|-------------------------------------------------------------------------|--|--|--|--|--------|--------|-------|-------|
|                                 | basic unit  |        | $M_1$               | 486, 585, 684, 783, 882, 981, 1080, 1179, 1278, 1377 |                                                                         |  |  |  |  |        |        |       |       |
| NaF                             | N-with      |        | $[M_1+F]^-$         | m/z                                                  | n/a                                                                     |  |  |  |  |        |        |       |       |
| NaCl                            | N-with      | C      | $[M_1+Cl]^-$        | m/z                                                  | 521, 620, 719, 818, 917, 1016, 1115, 1214, 1313, 1412, 1511, 1610, 1709 |  |  |  |  | 986.8  | 1029.2 | 1.043 |       |
| NaBr                            | N-with      | E      | $[M_1+Br]^-$        | m/z                                                  | 567, 666, 765, 864, 963, 1062, 1161, 1260, 1359, 1458, 1557, 1656, 1755 |  |  |  |  | 1082.1 | 1126.4 | 1.041 |       |
| NaI                             | N-with      | H      | $[M_1+I]^-$         | m/z                                                  | 712, 811, 910, 1009, 1108, 1207, 1306, 1405, 1504, 1603, 1702           |  |  |  |  | 1065.6 | 1103.5 | 1.035 |       |
| NaNO <sub>3</sub>               | N-with      | A      | $[M_1+NO_3]^-$      | m/z                                                  | 548, 647, 746, 845, 944, 1043, 1142, 1241, 1340, 1439, 1538, 1637, 1736 |  |  |  |  | 968.2  | 1033.8 | 1.068 |       |
| Na <sub>2</sub> SO <sub>4</sub> | N-with      | L      | $[M_1+HSO_4]^-$     | m/z                                                  | 682, 781, 880, 979, 1078, 1177, 1276, 1375, 1474, 1573                  |  |  |  |  | 1028.8 | 1063.4 | 1.034 |       |
| Na <sub>3</sub> PO <sub>4</sub> | N-with      | L      | $[M_1+H_2PO_4]^-$   | m/z                                                  | 583, 682, 781, 880, 979, 1078, 1177, 1276                               |  |  |  |  | 821.6  | 856.5  | 1.043 |       |
|                                 | basic unit  |        | $M_2$               | 414, 513, 612, 711, 810, 909, 1008, 1107, 1206       |                                                                         |  |  |  |  |        |        |       |       |
| NaF                             | N-with      |        | $[M_2+F]^-$         | m/z                                                  | n/a                                                                     |  |  |  |  |        |        |       |       |
| NaCl                            | N-with      | A      | $[M_2+Cl]^-$        | m/z                                                  | 548, 647, 746, 845, 944, 1043, 1142, 1241, 1340, 1439, 1538             |  |  |  |  | 816.6  | 858.0  | 1.051 |       |
| NaBr                            | N-with      | D      | $[M_2+Br]^-$        | m/z                                                  | 594, 693, 792, 891, 990, 1089, 1188, 1287, 1386, 1485, 1584             |  |  |  |  | 900.8  | 950.5  | 1.055 |       |
| NaI                             | N-with      | G      | $[M_2+I]^-$         | m/z                                                  | 640, 739, 838, 937, 1036, 1135, 1234, 1333, 1432, 1531                  |  |  |  |  | 904.0  | 935.9  | 1.035 |       |
| NaNO <sub>3</sub>               | N-with      | O      | $[M_2+NO_3]^-$      | m/z                                                  | 476, 575, 674, 773, 872, 971, 1070, 1169, 1268, 1367, 1466              |  |  |  |  | 805.9  | 858.9  | 1.066 |       |
| Na <sub>2</sub> SO <sub>4</sub> | N-with      | M      | $[M_2+HSO_4]^-$     | m/z                                                  | 511, 610, 709, 808, 907, 1006, 1105                                     |  |  |  |  | 810.0  | 841.6  | 1.039 |       |
| Na <sub>3</sub> PO <sub>4</sub> | N-with      | M      | $[M_2+H_2PO_4]^-$   | m/z                                                  | 511, 610, 709, 808, 907, 1006                                           |  |  |  |  | 666.6  | 691.5  | 1.037 |       |
|                                 | basic unit  |        | $M_3$               | 442, 541, 640, 739                                   |                                                                         |  |  |  |  |        |        |       |       |
| NaF                             | N-with      |        | $[M_3+F]^-$         | m/z                                                  | n/a                                                                     |  |  |  |  |        |        |       |       |
| NaCl                            | N-with      | B      | $[M_3+Cl]^-$        | m/z                                                  | 477, 576, 675, 774, 873, 972                                            |  |  |  |  | 736.6  | 759.2  | 1.031 |       |
| NaBr                            | N-with      | C      | $[M_3+Br]^-$        | m/z                                                  | 622, 721, 820, 919, 1018, 1117, 1216                                    |  |  |  |  | 868.4  | 905.9  | 1.043 |       |
| NaI                             | N-with      | I      | $[M_3+I]^-$         | m/z                                                  | 688, 767, 866, 965,                                                     |  |  |  |  | 801.7  | 814.8  | 1.016 |       |
| NaNO <sub>3</sub>               | N-with      | K      | $[M_3+NO_3]^-$      | m/z                                                  | 504, 603, 702, 801                                                      |  |  |  |  | 641.4  | 650.0  | 1.013 |       |
| Na <sub>2</sub> SO <sub>4</sub> | N-with      |        | $[M_3+HSO_4]^-$     | m/z                                                  | n/a                                                                     |  |  |  |  |        |        |       |       |
| Na <sub>3</sub> PO <sub>4</sub> | N-with      | N      | $[M_3+NaH_2PO_4]^-$ | m/z                                                  | 759, 858, 957, 1056, 1155, 1254, 1353, 1452, 1551                       |  |  |  |  | 1052.2 | 1083.5 | 1.030 |       |
|                                 | basic unit  |        | $M_4$               | 756, 855, 954, 1053, 1152, 1251                      |                                                                         |  |  |  |  |        |        |       |       |
| NaF                             | N-with      |        | $[M_4+F]^-$         | m/z                                                  | n/a                                                                     |  |  |  |  |        |        |       |       |
| NaCl                            | N-with      | D      | $[M_4+Cl]^-$        | m/z                                                  | 890, 989, 1088, 1187, 1286, 1385, 1484, 1583, 1682                      |  |  |  |  | 1206.8 | 1249.5 | 1.035 |       |
| NaBr                            | N-with      | F      | $[M_4+Br]^-$        | m/z                                                  | 936, 1035, 1134, 1233, 1332, 1431, 1530, 1629, 1728                     |  |  |  |  | 1292.6 | 1326.9 | 1.027 |       |
| NaI                             | N-with      | J      | $[M_4+I]^-$         | m/z                                                  | 1081, 1180, 1279, 1378, 1477, 1576, 1675, 1774                          |  |  |  |  | 1352.0 | 1379.3 | 1.020 |       |
| NaNO <sub>3</sub>               | N-with      | C      | $[M_4+NO_3]^-$      | m/z                                                  | 521, 620, 719, 818, 917, 1016, 1115, 1214, 1313, 1412, 1511, 1610, 1709 |  |  |  |  | 1052.3 | 1123.9 | 1.068 |       |
| Na <sub>2</sub> SO <sub>4</sub> | N-with      |        | $[M_4+HSO_4]^-$     | m/z                                                  | n/a                                                                     |  |  |  |  |        |        |       |       |
| Na <sub>3</sub> PO <sub>4</sub> | N-with      |        | $[M_4+H_2PO_4]^-$   | m/z                                                  | n/a                                                                     |  |  |  |  |        |        |       |       |

Note: "N-with" means negative ion mode and with related salt, and "n/a" means no related peaks in mass spectrum.

**Table S5.** Comparison of the observed peaks and related parameters of different GAP samples without and with addition of NaNO<sub>3</sub> in negative ion modes with paper spray

| sample    | with or not | series                                          | composition                                                                | observed peaks                                                                               | <i>M<sub>n</sub></i> | <i>M<sub>w</sub></i> | <i>PDI</i> |
|-----------|-------------|-------------------------------------------------|----------------------------------------------------------------------------|----------------------------------------------------------------------------------------------|----------------------|----------------------|------------|
|           |             |                                                 | M <sub>1</sub>                                                             | 387, 486, 585, 684, 783, 882, 981, 1080, 1179, 1278, 1377, 1476, 1575, 1674, 1773, 1872      |                      |                      |            |
| GAP #2    | N-without   | A                                               | [M <sub>1</sub> +NO <sub>3</sub> ] <sup>-</sup>                            | m/z 449, 548, 647, 746, 845, 944, 1043, 1142, 1241, 1340, 1439, 1538, 1637, 1736, 1835, 1934 | 789.2                | 881.7                | 1.117      |
|           | N-with      | A                                               | [M <sub>1</sub> +NO <sub>3</sub> ] <sup>-</sup>                            | m/z 548, 647, 746, 845, 944, 1043, 1142, 1241, 1340, 1439, 1538, 1637, 1736, 1835, 1934      | 934.2                | 1033.0               | 1.106      |
|           | basic unit  |                                                 | M <sub>2</sub>                                                             | 513, 612, 711, 810, 909, 1008, 1107, 1206, 1305, 1404, 1503, 1602, 1701, 1800                |                      |                      |            |
|           | N-without   | B                                               | [M <sub>2</sub> +NO <sub>3</sub> ] <sup>-</sup>                            | m/z 575, 674, 773, 872, 971, 1070, 1169, 1268, 1367, 1466, 1565, 1664, 1763, 1862            | 924.9                | 1028.6               | 1.112      |
|           | N-with      | B                                               | [M <sub>2</sub> +NO <sub>3</sub> ] <sup>-</sup>                            | m/z 575, 674, 773, 872, 971, 1070, 1169, 1268, 1367, 1466, 1565, 1664, 1763, 1862            | 957.2                | 1068.7               | 1.116      |
|           | basic unit  |                                                 | M <sub>3</sub>                                                             | 541, 640, 739, 838, 937, 1036, 1135, 1234, 1333, 1432, 1531, 1630, 1729                      |                      |                      |            |
| N-without | C           | [M <sub>3</sub> +NO <sub>3</sub> ] <sup>-</sup> | m/z 603 702, 801, 900, 999, 1098, 1197, 1296                               | 785.9                                                                                        | 831.3                | 1.058                |            |
| N-with    | C           | [M <sub>3</sub> +NO <sub>3</sub> ] <sup>-</sup> | m/z 603 702, 801, 900, 999, 1098, 1197, 1296, 1395, 1494, 1593, 1692, 1791 | 1036.4                                                                                       | 1116.2               | 1.077                |            |
|           |             |                                                 | M <sub>1</sub>                                                             | 387, 486, 585, 684, 783, 882, 981, 1080, 1179, 1278, 1377, 1476, 1575, 1674, 1773, 1872      |                      |                      |            |
| GAP #3    | N-without   | A                                               | [M <sub>1</sub> +NO <sub>3</sub> ] <sup>-</sup>                            | m/z 548, 647, 746, 845, 944, 1043, 1142, 1241, 1340, 1439, 1538, 1637, 1736                  | 795.0                | 869.6                | 1.094      |
|           | N-with      | A                                               | [M <sub>1</sub> +NO <sub>3</sub> ] <sup>-</sup>                            | m/z 548, 647, 746, 845, 944, 1043, 1142, 1241, 1340, 1439, 1538, 1637, 1736, 1835, 1934      | 1127.1               | 1198.2               | 1.063      |
|           | basic unit  |                                                 | M <sub>2</sub>                                                             | 513, 612, 711, 810, 909, 1008, 1107, 1206, 1305, 1404, 1503, 1602, 1701, 1800                |                      |                      |            |
|           | N-without   | B                                               | [M <sub>2</sub> +NO <sub>3</sub> ] <sup>-</sup>                            | m/z 575, 674, 773, 872, 971, 1070, 1169, 1268                                                | 758.0                | 790.6                | 1.043      |
|           | N-with      | B                                               | [M <sub>2</sub> +NO <sub>3</sub> ] <sup>-</sup>                            | m/z 575, 674, 773, 872, 971, 1070, 1169, 1268, 1367, 1466, 1565, 1664, 1763, 1862            | 1093.0               | 1163.9               | 1.065      |
|           | basic unit  |                                                 | M <sub>3</sub>                                                             | 541, 640, 739, 838, 937, 1036, 1135, 1234, 1333, 1432, 1531, 1630, 1729                      |                      |                      |            |
|           | N-without   | C                                               | [M <sub>3</sub> +NO <sub>3</sub> ] <sup>-</sup>                            | m/z 603 702                                                                                  | 648.4                | 652.2                | 1.006      |
|           | N-with      | C                                               | [M <sub>3</sub> +NO <sub>3</sub> ] <sup>-</sup>                            | m/z 603 702, 801, 900, 999, 1098, 1197, 1296, 1395                                           | 929.0                | 973.2                | 1.048      |
|           | basic unit  |                                                 | M <sub>4</sub>                                                             | 1152, 1251, 1350, 1449, 1548, 1647, 1746, 1845                                               |                      |                      |            |
|           | N-without   | D                                               | [M <sub>4</sub> +NO <sub>3</sub> ] <sup>-</sup>                            | m/z 1214, 1313, 1412, 1511, 1610, 1709, 1808                                                 | 1426.5               | 1447.2               | 1.015      |
| N-with    | D           | [M <sub>4</sub> +NO <sub>3</sub> ] <sup>-</sup> | m/z 1214, 1313, 1412, 1511, 1610, 1709, 1808, 1907                         | 1498.3                                                                                       | 1523.9               | 1.017                |            |
|           |             |                                                 | M <sub>1</sub>                                                             | 387, 486, 585, 684, 783, 882, 981, 1080, 1179, 1278, 1377, 1476, 1575, 1674, 1773, 1872      |                      |                      |            |
| GAP #4    | N-without   | A                                               | [M <sub>1</sub> +NO <sub>3</sub> ] <sup>-</sup>                            | m/z 548, 647, 746, 845, 944, 1043, 1142, 1241, 1340, 1439, 1538, 1637, 1736, 1835            | 897.7                | 981.8                | 1.094      |
|           | N-with      | A                                               | [M <sub>1</sub> +NO <sub>3</sub> ] <sup>-</sup>                            | m/z 548, 647, 746, 845, 944, 1043, 1142, 1241, 1340, 1439, 1538, 1637, 1736, 1835, 1934      | 1134.3               | 1195.0               | 1.054      |
|           | basic unit  |                                                 | M <sub>2</sub>                                                             | 513, 612, 711, 810, 909, 1008, 1107, 1206, 1305, 1404, 1503, 1602, 1701, 1800                |                      |                      |            |
|           | N-without   | B                                               | [M <sub>2</sub> +NO <sub>3</sub> ] <sup>-</sup>                            | m/z 575, 674, 773, 872, 971, 1070, 1169, 1268, 1367, 1466, 1565, 1664                        | 962.4                | 1046.1               | 1.087      |
|           | N-with      | B                                               | [M <sub>2</sub> +NO <sub>3</sub> ] <sup>-</sup>                            | m/z 575, 674, 773, 872, 971, 1070, 1169, 1268, 1367, 1466, 1565, 1664, 1763, 1862, 1961      | 1154.1               | 1241.3               | 1.076      |
|           | basic unit  |                                                 | M <sub>3</sub>                                                             | 541, 640, 739, 838, 937, 1036, 1135, 1234, 1333, 1432, 1531, 1630, 1729                      |                      |                      |            |
|           | N-without   | C                                               | [M <sub>3</sub> +NO <sub>3</sub> ] <sup>-</sup>                            | m/z 603 702, 801                                                                             | 691.3                | 699.5                | 1.012      |
|           | N-with      | C                                               | [M <sub>3</sub> +NO <sub>3</sub> ] <sup>-</sup>                            | m/z 603 702, 801, 900, 999, 1098, 1197, 1296, 1395, 1494, 1593, 1692, 1791                   | 1105.8               | 1164.0               | 1.053      |

Note: "N-without" means negative ion mode and without NaNO<sub>3</sub>, and "N-with" means negative ion mode and with NaNO<sub>3</sub>.

**Table S6.** Comparison of the observed peaks and related parameters of different GAP samples without and with addition of NaNO<sub>3</sub> in negative ion modes using nanoESI

| sample | with or not | series                                          | composition                                                                  | observed peaks                                                                          | <i>M<sub>n</sub></i>                                  | <i>M<sub>w</sub></i> | <i>PDI</i> |
|--------|-------------|-------------------------------------------------|------------------------------------------------------------------------------|-----------------------------------------------------------------------------------------|-------------------------------------------------------|----------------------|------------|
| GAP #1 |             |                                                 | M <sub>1</sub>                                                               | 387, 486, 585, 684, 783, 882, 981, 1080, 1179, 1278, 1377                               |                                                       |                      |            |
|        |             | A                                               | [M <sub>1</sub> +NO <sub>3</sub> ] <sup>-</sup>                              | m/z 449, 548, 647, 746, 845, 944, 1043, 1142, 1241, 1340, 1439, 1538                    | 839.6                                                 | 891.4                | 1.062      |
|        |             | E                                               | [M <sub>1</sub> +X*] <sup>-</sup>                                            | m/z 484, 583, 682, 781, 880, 979, 1078, 1177                                            | 831.6                                                 | 864.4                | 1.039      |
|        |             | A                                               | [M <sub>1</sub> +NO <sub>3</sub> ] <sup>-</sup>                              | m/z 647, 746, 845, 944, 1043, 1142, 1241, 1340, 1439, 1538, 1637                        | 1079.5                                                | 1111.5               | 1.030      |
|        |             |                                                 | M <sub>2</sub>                                                               | 315, 414, 513, 612, 711, 810, 909, 1008, 1107, 1206, 1305, 1404                         |                                                       |                      |            |
|        |             | B                                               | [M <sub>2</sub> +NO <sub>3</sub> ] <sup>-</sup>                              | m/z 674, 773, 872, 971, 1070                                                            | 883.6                                                 | 911.2                | 1.031      |
|        |             | D                                               | [M <sub>2</sub> +X*] <sup>-</sup>                                            | m/z 412, 511, 610, 709, 808                                                             | 615.7                                                 | 638.7                | 1.038      |
|        |             | B                                               | [M <sub>2</sub> +NO <sub>3</sub> ] <sup>-</sup>                              | m/z 674, 773, 872, 971, 1070, 1169, 1268, 1367, 1466                                    | 938.5                                                 | 969.0                | 1.033      |
|        |             |                                                 | M <sub>3</sub>                                                               | 442, 541, 640, 739                                                                      |                                                       |                      |            |
|        |             |                                                 | [M <sub>3</sub> +NO <sub>3</sub> ] <sup>-</sup>                              | m/z n/a                                                                                 |                                                       |                      |            |
|        |             |                                                 | [M <sub>3</sub> +NO <sub>3</sub> ] <sup>-</sup>                              | m/z n/a                                                                                 |                                                       |                      |            |
|        | GAP #2      |                                                 |                                                                              | M <sub>4</sub>                                                                          | 558, 657, 756, 855, 954, 1053, 1152, 1251, 1350, 1449 |                      |            |
|        |             | C                                               | [M <sub>4</sub> +NO <sub>3</sub> ] <sup>-</sup>                              | m/z 620, 719, 818, 917, 1016, 1115, 1214, 1313, 1412, 1511                              | 941.1                                                 | 976.8                | 1.038      |
|        |             | C                                               | [M <sub>4</sub> +NO <sub>3</sub> ] <sup>-</sup>                              | m/z 917, 1016, 1115, 1214, 1313, 1412, 1511, 1610                                       | 1225.2                                                | 1260.5               | 1.029      |
|        |             |                                                 | M <sub>1</sub>                                                               | 387, 486, 585, 684, 783, 882, 981, 1080, 1179, 1278, 1377, 1476, 1575, 1674, 1773, 1872 |                                                       |                      |            |
|        |             | A                                               | [M <sub>1</sub> +NO <sub>3</sub> ] <sup>-</sup>                              | m/z 449, 548, 647, 746, 845, 944, 1043, 1142, 1241                                      | 906.9                                                 | 964.1                | 1.063      |
|        |             |                                                 | [M <sub>1</sub> +NO <sub>3</sub> ] <sup>-</sup>                              | m/z n/a                                                                                 |                                                       |                      |            |
|        |             |                                                 | M <sub>2</sub>                                                               | 315, 414, 513, 612, 711, 810, 909, 1008, 1107, 1206, 1305, 1404, 1503, 1602, 1701, 1800 |                                                       |                      |            |
|        |             | D                                               | [M <sub>2</sub> +X*] <sup>-</sup>                                            | m/z 412, 511, 610, 709, 808, 907, 1006, 1105, 1204, 1303, 1402                          | 817.6                                                 | 902.6                | 1.104      |
|        |             | B                                               | [M <sub>2</sub> +NO <sub>3</sub> ] <sup>-</sup>                              | m/z 674, 773, 872, 971, 1070, 1169, 1268, 1367, 1466, 1565, 1664, 1763, 1862            | 1227.6                                                | 1298.3               | 1.058      |
|        |             |                                                 | M <sub>3</sub>                                                               | 640, 739, 838, 937, 1036, 1135, 1234, 1333, 1432, 1531, 1630, 1729, 1828                |                                                       |                      |            |
|        |             |                                                 | [M <sub>3</sub> +NO <sub>3</sub> ] <sup>-</sup>                              | m/z n/a                                                                                 |                                                       |                      |            |
|        |             | F                                               | [M <sub>3</sub> +NO <sub>3</sub> ] <sup>-</sup>                              | m/z 702, 801, 900, 999, 1098, 1197, 1296, 1395, 1494, 1593, 1692, 1791, 1890            | 1333.0                                                | 1380.1               | 1.035      |
| GAP #3 |             |                                                 | M <sub>4</sub>                                                               | 950, 1049, 1148, 1247, 1346, 1445, 1544                                                 |                                                       |                      |            |
|        |             |                                                 | [M <sub>4</sub> +NO <sub>3</sub> ] <sup>-</sup>                              | m/z n/a                                                                                 |                                                       |                      |            |
|        |             | H                                               | [M <sub>4</sub> +NO <sub>3</sub> ] <sup>-</sup>                              | m/z 1012, 1111, 1210, 1309, 1408, 1507, 1606                                            | 1312.0                                                | 1329.6               | 1.013      |
|        |             |                                                 | M <sub>5</sub>                                                               | 999, 1098, 1197, 1296, 1395, 1494, 1593, 1692                                           |                                                       |                      |            |
|        |             |                                                 | [M <sub>5</sub> +NO <sub>3</sub> ] <sup>-</sup>                              | m/z n/a                                                                                 |                                                       |                      |            |
|        |             | G                                               | [M <sub>5</sub> +NO <sub>3</sub> ] <sup>-</sup>                              | m/z 1061, 1160, 1259, 1358, 1457, 1556, 1655, 1754                                      | 1324.3                                                | 1348.1               | 1.018      |
|        |             |                                                 | M <sub>1</sub>                                                               | 387, 486, 585, 684, 783, 882, 981, 1080, 1179, 1278, 1377, 1476, 1575, 1674, 1773, 1872 |                                                       |                      |            |
|        |             | A                                               | [M <sub>1</sub> +NO <sub>3</sub> ] <sup>-</sup>                              | m/z 746, 845, 944, 1043, 1142, 1241, 1340, 1439, 1538                                   | 1079.5                                                | 1118.6               | 1.036      |
|        |             | A                                               | [M <sub>1</sub> +NO <sub>3</sub> ] <sup>-</sup>                              | m/z 746, 845, 944, 1043, 1142, 1241, 1340, 1439, 1538, 1637, 1736, 1835, 1934           | 1329.4                                                | 1382.6               | 1.040      |
|        |             |                                                 | M <sub>2</sub>                                                               | 315, 414, 513, 612, 711, 810, 909, 1008, 1107, 1206, 1305, 1404, 1503, 1602             |                                                       |                      |            |
|        |             | D                                               | [M <sub>2</sub> +X*] <sup>-</sup>                                            | m/z 412, 511, 610, 709, 808, 907, 1006, 1105, 1204, 1303                                | 870.7                                                 | 917.1                | 1.053      |
|        |             | B                                               | [M <sub>2</sub> +NO <sub>3</sub> ] <sup>-</sup>                              | m/z 872, 971, 1070, 1169                                                                | 1027.6                                                | 1038.2               | 1.010      |
|        | B           | [M <sub>2</sub> +NO <sub>3</sub> ] <sup>-</sup> | m/z 674, 773, 872, 971, 1070, 1169, 1268, 1367, 1466, 1565, 1664, 1763, 1862 | 1109.0                                                                                  | 1155.5                                                | 1.042                |            |
| GAP #4 |             |                                                 | M <sub>3</sub>                                                               | 640, 739, 838, 937, 1036, 1135, 1234, 1333, 1432, 1531, 1630                            |                                                       |                      |            |
|        |             |                                                 | [M <sub>3</sub> +NO <sub>3</sub> ] <sup>-</sup>                              | m/z n/a                                                                                 |                                                       |                      |            |
|        |             | F                                               | [M <sub>3</sub> +NO <sub>3</sub> ] <sup>-</sup>                              | m/z 702, 801, 900, 999, 1098, 1197, 1296, 1395                                          | 1022.4                                                | 1051.0               | 1.028      |
|        |             |                                                 | M <sub>1</sub>                                                               | 387, 486, 585, 684, 783, 882, 981, 1080, 1179, 1278, 1377, 1476, 1575, 1674, 1773, 1872 |                                                       |                      |            |
|        |             | A                                               | [M <sub>1</sub> +NO <sub>3</sub> ] <sup>-</sup>                              | m/z 449, 548, 647, 746, 845, 944, 1043, 1142, 1241, 1340, 1439, 1538, 1637              | 1119.6                                                | 1186.9               | 1.060      |
|        |             |                                                 | [M <sub>1</sub> +NO <sub>3</sub> ] <sup>-</sup>                              | m/z n/a                                                                                 |                                                       |                      |            |
|        |             |                                                 | M <sub>2</sub>                                                               | 315, 414, 513, 612, 711, 810, 909, 1008, 1107, 1206, 1305, 1404, 1503, 1602             |                                                       |                      |            |
|        |             | D                                               | [M <sub>2</sub> +X*] <sup>-</sup>                                            | m/z 412, 511, 610, 709, 808, 907, 1006, 1105, 1204, 1303, 1402                          | 910.1                                                 | 971.5                | 1.067      |
|        |             | B                                               | [M <sub>2</sub> +NO <sub>3</sub> ] <sup>-</sup>                              | m/z 872, 971, 1070, 1169, 1268, 1367, 1466                                              | 1150.5                                                | 1180.6               | 1.026      |
|        |             | B                                               | [M <sub>2</sub> +NO <sub>3</sub> ] <sup>-</sup>                              | m/z 674, 773, 872, 971, 1070, 1169, 1268, 1367, 1466, 1565, 1664, 1763, 1862            | 1255.1                                                | 1309.0               | 1.043      |
|        |             |                                                 | M <sub>3</sub>                                                               | 640, 739, 838, 937, 1036, 1135, 1234, 1333, 1432, 1531, 1630, 1729, 1828                |                                                       |                      |            |
|        |             |                                                 | [M <sub>3</sub> +NO <sub>3</sub> ] <sup>-</sup>                              | m/z n/a                                                                                 |                                                       |                      |            |
|        | F           | [M <sub>3</sub> +NO <sub>3</sub> ] <sup>-</sup> | m/z 702, 801, 900, 999, 1098, 1197, 1296, 1395, 1494, 1593, 1692, 1791, 1890 | 1269.5                                                                                  | 1313.0                                                | 1.034                |            |
|        |             | M <sub>4</sub>                                  | 788, 887, 986, 1085, 1184, 1283, 1382, 1481, 1580, 1679, 1778                |                                                                                         |                                                       |                      |            |
|        |             | [M <sub>4</sub> +NO <sub>3</sub> ] <sup>-</sup> | m/z n/a                                                                      |                                                                                         |                                                       |                      |            |
|        | H           | [M <sub>4</sub> +NO <sub>3</sub> ] <sup>-</sup> | m/z 850, 949, 1048, 1147, 1246, 1345, 1444, 1543, 1642, 1741, 1840           | 1345.7                                                                                  | 1378.8                                                | 1.025                |            |

Note: "N-without" means negative ion mode and without NaNO<sub>3</sub>, and "N-with" means negative ion mode and with NaNO<sub>3</sub>; X\* is either HSO<sub>4</sub><sup>-</sup> or H<sub>2</sub>PO<sub>4</sub><sup>-</sup>; "n/a" means no signal.

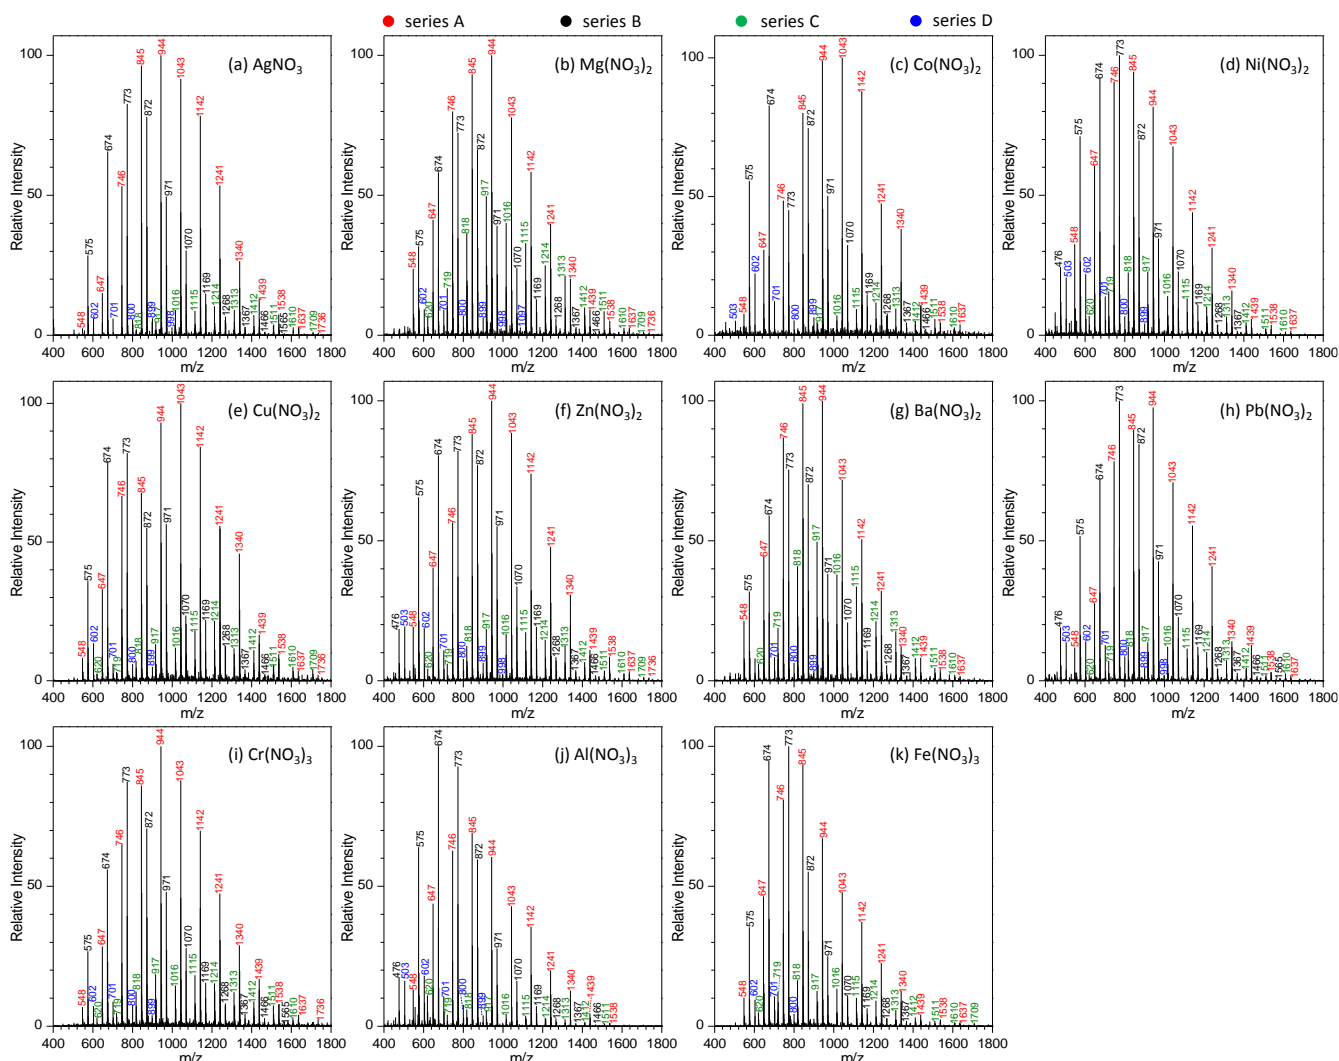

**Figure S1.** Effect of the type of metal salt on the analysis of 100  $\mu\text{g mL}^{-1}$  GAP #1: (a)  $\text{AgNO}_3$ , (b)  $\text{Mg}(\text{NO}_3)_2$ , (c)  $\text{Co}(\text{NO}_3)_2$ , (d)  $\text{Ni}(\text{NO}_3)_2$ , (e)  $\text{Cu}(\text{NO}_3)_2$ , (f)  $\text{Zn}(\text{NO}_3)_2$ , (g)  $\text{Ba}(\text{NO}_3)_2$ , (h)  $\text{Pb}(\text{NO}_3)_2$ , (i)  $\text{Cr}(\text{NO}_3)_3$ , (j)  $\text{Al}(\text{NO}_3)_3$ , and (k)  $\text{Fe}(\text{NO}_3)_3$  (sample volume: 25  $\mu\text{L}$  for each spray; applied voltage: -3.5 kV; concentration of each metal salt in GAP #1 solution: 1.0  $\text{mmol L}^{-1}$ ).

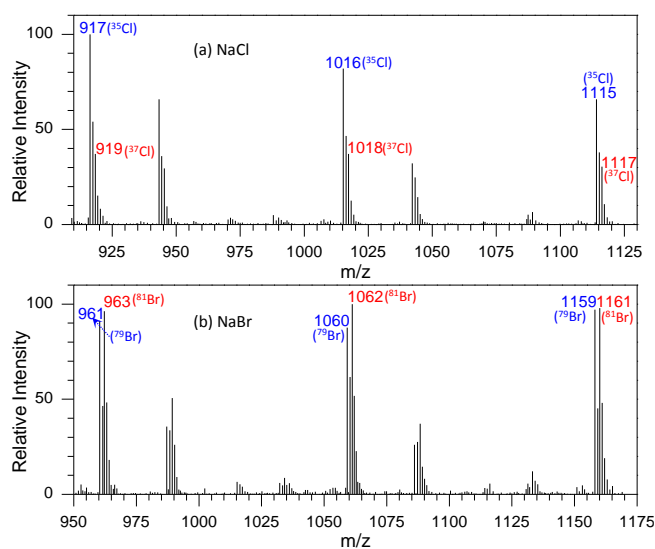

**Figure S2.** Mass spectra of GAP #1 solution in the presence of (a) NaCl and (b) NaBr (sample volume: 25  $\mu\text{L}$  for each spray; applied voltage: -3.5 kV; concentration of each metal salt in GAP #1 solution: 1.0  $\text{mmol L}^{-1}$ ).

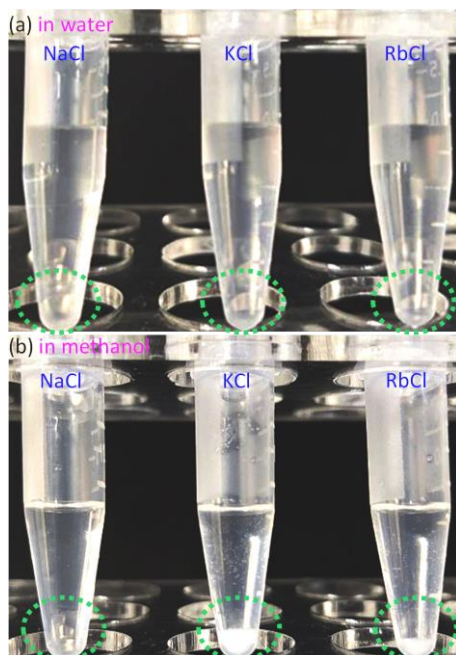

**Figure S3.** Comparison of the solubility of NaCl, KCl, and RbCl **(a)** in water and **(b)** in methanol (*Note:* For dissolving different salts into water, exactly measured 2.5 mmol of corresponding salts into 1.0 mL deionized water followed by vibration for 5.0 min; for dissolving different salts into methanol, transferred 100  $\mu\text{L}$  of 2.5 mmol  $\text{mL}^{-1}$  the related aqueous solutions into 900  $\mu\text{L}$  methanol followed by vibration for 5.0 min).

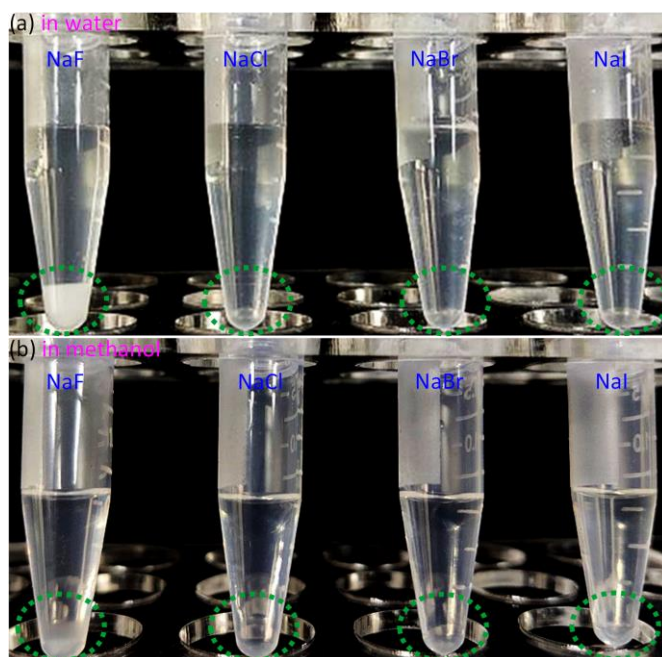

**Figure S4.** Comparison of the solubility of NaF, NaCl, NaBr, and NaI **(a)** in water and **(b)** in methanol (*Note:* For dissolving different salts into water, exactly measured 2.5 mmol of corresponding salts into 1.0 mL deionized water followed by vibration for 5.0 min; for dissolving different salts into methanol, transferred 100  $\mu\text{L}$  of 2.5 mmol  $\text{mL}^{-1}$  the related aqueous solutions into 900  $\mu\text{L}$  methanol followed by vibration for 5.0 min).



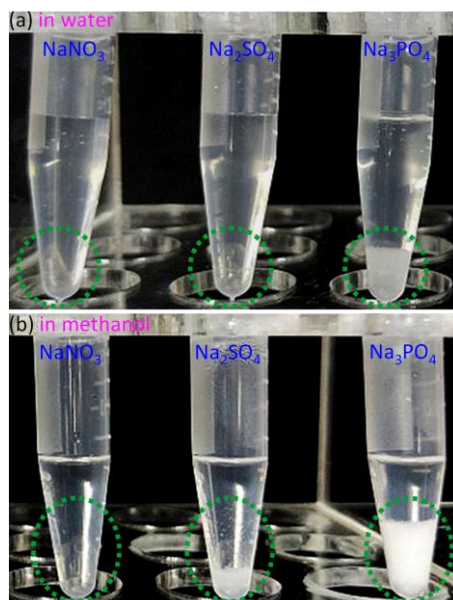

**Figure S5.** Comparison of the solubility of  $\text{NaNO}_3$ ,  $\text{Na}_2\text{SO}_4$ , and  $\text{Na}_3\text{PO}_4$  (a) in water and (b) in methanol (Note: For dissolving different salts into water, exactly measured 2.5 mmol of corresponding salts into 1.0 mL deionized water followed by vibration for 5.0 min; for dissolving different salts into methanol, transferred 100  $\mu\text{L}$  of 2.5 mmol  $\text{mL}^{-1}$  the related aqueous solutions into 900  $\mu\text{L}$  methanol followed by vibration for 5.0 min).
